# Supplementary material for: Nutritional Compositions, Phenolic Contents, and Antioxidant Potentials of Ten Original Lineage Beans in Thailand
Source: MDPI journal article supplement (doi:10.3390/foods11142062), 2022-07-12
Supplement: s1 [file s1]

## Supplementary materials

# Nutritional Compositions, Phenolic Contents, and Antioxidant Potentials of Ten Original Lineage Beans in Thailand

Yuraporn Sahasakul <sup>1</sup>, Amornrat Aursalung <sup>1</sup>, Sirinapa Thangsiri <sup>1</sup>, Pitthaya Wongchang <sup>2</sup>, Parichart Sangkasa-ad <sup>2</sup>, Aphinya Wongpia <sup>2</sup>, Auytin Polpanit <sup>3</sup>, Woorawee Inthachat <sup>1</sup>, Piya Temviriyankul <sup>1</sup> and Uthaiwan Suttisansanee <sup>1,\*</sup>

<sup>1</sup> Food and Nutrition Academic and Research Cluster, Institute of Nutrition, Mahidol University, Salaya, Phuttamonthon, Nakhon Pathom 73170, Thailand; yuraporn.sah@mahidol.ac.th (Y.S.); amornrat.aur@mahidol.ac.th (A.A.); sirinapa.tha@mahidol.ac.th (S.T.); woorawee.int@mahidol.ac.th (W.I.); piya.tem@mahidol.ac.th (P.T.)

<sup>2</sup> Biotechnology Research and Development Office, Department of Agriculture Rangsit-Nakorn Nayok, Rangsit (Klong 6), Thanyaburi, Pathum Thani 12100, Thailand; pitthaya@hotmail.com (P.W.); psk50\_2003@hotmail.com (P.S.-a.); aphinya.wongpia@gmail.com (A.W.)

<sup>3</sup> Chiang Mai Field Crops Research Center, Department of Agriculture, Nong Han, San Sai District, Chiang Mai 50290, Thailand; auytin1804@hotmail.com (A.P.)

\* Correspondence: uthaiwan.sut@mahidol.ac.th (U.S.); Tel.: +66-(0)-2800-2380 (ext.422)

**Supplementary Table S1:**

Morphological characteristics (seed width, length, and thickness) of ten bean cultivars.

| Cultivars | Seed width<br>(mm) | Seed length<br>(mm) | Seed thickness<br>(mm) |
|-----------|--------------------|---------------------|------------------------|
| 38        | 10.04 ± 0.72       | 14.54 ± 0.87        | 4.71 ± 1.93            |
| 47        | 8.56 ± 0.62        | 12.89 ± 0.66        | 4.55 ± 1.29            |
| 59        | 9.87 ± 0.80        | 14.55 ± 1.39        | 4.80 ± 1.64            |
| 112       | 6.25 ± 0.77        | 16.10 ± 1.18        | 6.19 ± 0.51            |
| 107       | 4.60 ± 0.44        | 7.61 ± 0.53         | 3.65 ± 0.27            |
| 108       | 4.93 ± 0.36        | 7.24 ± 0.58         | 4.94 ± 0.50            |
| CN4       | 3.84 ± 0.39        | 4.87 ± 0.47         | 3.56 ± 0.33            |
| CN84-1    | 4.03 ± 0.26        | 5.65 ± 0.62         | 3.93 ± 0.09            |
| SJ5       | 6.00 ± 0.47        | 7.27 ± 0.47         | 4.83 ± 0.46            |
| CM60      | 6.53 ± 0.26        | 7.39 ± 0.32         | 5.89 ± 0.47            |

All data were expressed as mean ± standard deviation (SD) of triplicate experiments ( $n = 3$ ). Seed sizes were determined using a 0.01mm/0.0005" digital Vernier.

## Supplementary Table S2:

Color values of ten bean cultivars (fresh seeds and powdered samples).

| Cultivars | Color values |              |              |                  |                |              |
|-----------|--------------|--------------|--------------|------------------|----------------|--------------|
|           | Fresh Seeds  |              |              | Powdered Samples |                |              |
|           | L*           | a*           | b*           | L*               | a*             | b*           |
| 38        | 36.80 ± 1.34 | 11.87 ± 0.32 | 14.69 ± 0.09 | 54.43 ± 0.33     | 0.78 ± 0.10    | 7.37 ± 0.34  |
| 47        | 77.84 ± 0.14 | 2.15 ± 0.04  | 16.42 ± 0.06 | 58.59 ± 0.46     | 0.18 ± 0.05    | 10.26 ± 0.41 |
| 59        | 17.33 ± 0.33 | 4.42 ± 0.38  | 0.94 ± 0.05  | 54.23 ± 4.08     | 0.42 ± 0.02    | 6.51 ± 0.23  |
| 112       | 25.25 ± 1.22 | 15.89 ± 0.85 | 8.00 ± 0.72  | 54.26 ± 0.11     | 1.62 ± 0.01    | 4.98 ± 0.07  |
| 107       | 28.62 ± 0.25 | 10.45 ± 0.13 | 9.23 ± 0.16  | 52.33 ± 0.37     | 0.54 ± 0.04    | 5.88 ± 0.06  |
| 108       | 23.69 ± 0.29 | 14.76 ± 0.23 | 8.37 ± 0.03  | 51.82 ± 0.01     | 1.38 ± 0.01    | 6.10 ± 0.04  |
| CN4       | 26.88 ± 0.10 | 1.25 ± 0.03  | 6.35 ± 0.08  | 52.86 ± 0.24     | (-0.01) ± 0.02 | 5.44 ± 0.07  |
| CN84-1    | 35.02 ± 0.08 | 0.85 ± 0.02  | 26.24 ± 0.07 | 53.84 ± 0.61     | (-0.10) ± 0.05 | 10.17 ± 0.10 |
| SJ5       | 59.24 ± 0.06 | 9.10 ± 0.03  | 31.55 ± 0.03 | 53.75 ± 0.36     | 1.80 ± 0.12    | 18.61 ± 0.45 |
| CM60      | 57.46 ± 0.03 | 9.12 ± 0.01  | 32.41 ± 0.02 | 54.33 ± 0.24     | 1.16 ± 0.29    | 17.61 ± 0.22 |

All data were expressed as mean ± standard deviation (SD) of triplicate experiments ( $n = 3$ ). The colors were analyzed using a ColorFlex EZ spectrophotometer and expressed as CIELAB units, in which L\* represents darkness (0) to lightness (100), a\* represents green (-) to red (+) colors, and b\* represents blue (-) to yellow (+) colors.

### Supplementary Table S3:

Proximate compositions of ten bean cultivars (per 100 g fresh weight).

| Cultivars | Energy (kcal)               | Moisture (g)              | Protein (g)               | Fat (g)                    | Carbohydrate (g)          | Dietary fiber (g)          | Ash (g)                  |
|-----------|-----------------------------|---------------------------|---------------------------|----------------------------|---------------------------|----------------------------|--------------------------|
| 38        | 354.57 ± 1.37 <sup>e</sup>  | 9.62 ± 0.23 <sup>b</sup>  | 20.31 ± 0.11 <sup>g</sup> | 1.15 ± 0.11 <sup>de</sup>  | 65.76 ± 0.00 <sup>c</sup> | 19.29 ± 0.40 <sup>c</sup>  | 3.18 ± 0.01 <sup>i</sup> |
| 47        | 356.02 ± 0.19 <sup>e</sup>  | 9.06 ± 0.28 <sup>c</sup>  | 15.12 ± 0.19 <sup>i</sup> | 1.56 ± 0.25 <sup>c</sup>   | 70.38 ± 0.70 <sup>a</sup> | 19.94 ± 0.21 <sup>b</sup>  | 3.89 ± 0.01 <sup>e</sup> |
| 59        | 349.35 ± 0.92 <sup>f</sup>  | 10.37 ± 0.33 <sup>a</sup> | 17.21 ± 0.30 <sup>h</sup> | 1.19 ± 0.04 <sup>de</sup>  | 67.45 ± 0.02 <sup>b</sup> | 17.22 ± 0.31 <sup>e</sup>  | 3.79 ± 0.04 <sup>f</sup> |
| 112       | 361.70 ± 0.95 <sup>c</sup>  | 6.39 ± 0.14 <sup>e</sup>  | 21.53 ± 0.06 <sup>f</sup> | 1.30 ± 0.24 <sup>cd</sup>  | 65.98 ± 0.23 <sup>c</sup> | 19.59 ± 0.18 <sup>bc</sup> | 4.81 ± 0.09 <sup>c</sup> |
| 107       | 350.25 ± 1.24 <sup>f</sup>  | 9.44 ± 0.35 <sup>bc</sup> | 20.46 ± 0.02 <sup>g</sup> | 0.95 ± 0.02 <sup>ef</sup>  | 64.98 ± 0.32 <sup>d</sup> | 18.07 ± 0.08 <sup>d</sup>  | 4.18 ± 0.02 <sup>d</sup> |
| 108       | 360.94 ± 1.29 <sup>cd</sup> | 6.51 ± 0.19 <sup>e</sup>  | 25.20 ± 0.05 <sup>c</sup> | 0.72 ± 0.11 <sup>f</sup>   | 63.42 ± 0.13 <sup>e</sup> | 16.59 ± 0.32 <sup>f</sup>  | 4.16 ± 0.00 <sup>d</sup> |
| CN4       | 359.84 ± 0.32 <sup>d</sup>  | 7.96 ± 0.16 <sup>d</sup>  | 23.40 ± 0.16 <sup>e</sup> | 1.02 ± 0.11 <sup>def</sup> | 64.28 ± 0.48 <sup>d</sup> | 21.39 ± 0.03 <sup>a</sup>  | 3.35 ± 0.05 <sup>h</sup> |
| CN84-1    | 371.35 ± 0.67 <sup>b</sup>  | 5.12 ± 0.10 <sup>f</sup>  | 24.96 ± 0.08 <sup>d</sup> | 1.33 ± 0.05 <sup>cd</sup>  | 64.89 ± 0.02 <sup>d</sup> | 11.92 ± 0.12 <sup>h</sup>  | 3.71 ± 0.01 <sup>g</sup> |
| SJ5       | 458.72 ± 0.78 <sup>a</sup>  | 5.48 ± 0.10 <sup>f</sup>  | 38.19 ± 0.08 <sup>a</sup> | 20.06 ± 0.12 <sup>b</sup>  | 31.36 ± 0.16 <sup>g</sup> | 15.69 ± 0.03 <sup>g</sup>  | 4.92 ± 0.05 <sup>b</sup> |
| CM60      | 457.62 ± 0.36 <sup>a</sup>  | 6.57 ± 0.39 <sup>e</sup>  | 34.28 ± 0.08 <sup>b</sup> | 20.98 ± 0.36 <sup>a</sup>  | 32.93 ± 0.80 <sup>f</sup> | 15.94 ± 0.10 <sup>g</sup>  | 5.26 ± 0.02 <sup>a</sup> |

All data were expressed as mean ± standard deviation (SD) of triplicate experiments ( $n = 3$ ). Different superscript letters indicate significantly different contents of the same proximate composition in different bean cultivars ( $p < 0.05$ ) using one-way analysis of variance (ANOVA) and Duncan's multiple comparison test.

## Supplementary Table S4:

Vitamin contents of ten bean cultivars (per 100 g fresh weight).

| Cultivars | Vitamin B1 (mg)          | Vitamin B2 (mg)          | Vitamin B3 (mg)            |
|-----------|--------------------------|--------------------------|----------------------------|
| 38        | 0.47 ± 0.02 <sup>a</sup> | 0.03 ± 0.00 <sup>c</sup> | 1.19 ± 0.01 <sup>d</sup>   |
| 47        | 0.34 ± 0.01 <sup>c</sup> | 0.03 ± 0.01 <sup>c</sup> | 1.30 ± 0.01 <sup>bc</sup>  |
| 59        | 0.32 ± 0.01 <sup>c</sup> | 0.03 ± 0.00 <sup>c</sup> | 1.21 ± 0.01 <sup>cd</sup>  |
| 112       | 0.47 ± 0.00 <sup>a</sup> | 0.03 ± 0.01 <sup>c</sup> | 0.48 ± 0.06 <sup>f</sup>   |
| 107       | 0.13 ± 0.02 <sup>e</sup> | 0.03 ± 0.00 <sup>c</sup> | 1.41 ± 0.04 <sup>a</sup>   |
| 108       | 0.04 ± 0.00 <sup>g</sup> | 0.02 ± 0.00 <sup>d</sup> | 0.90 ± 0.14 <sup>e</sup>   |
| CN4       | 0.41 ± 0.02 <sup>b</sup> | 0.10 ± 0.00 <sup>a</sup> | 1.28 ± 0.04 <sup>bcd</sup> |
| CN84-1    | 0.16 ± 0.02 <sup>d</sup> | 0.04 ± 0.00 <sup>b</sup> | 1.29 ± 0.01 <sup>bc</sup>  |
| SJ5       | 0.43 ± 0.02 <sup>b</sup> | 0.03 ± 0.00 <sup>c</sup> | 1.35 ± 0.02 <sup>ab</sup>  |
| CM60      | 0.07 ± 0.00 <sup>f</sup> | 0.03 ± 0.00 <sup>c</sup> | 1.22 ± 0.02 <sup>cd</sup>  |

All data were expressed as mean ± standard deviation (SD) of triplicate experiments ( $n = 3$ ). Different superscript letters indicate significantly different contents of the same vitamin in different bean cultivars ( $p < 0.05$ ) using one-way analysis of variance (ANOVA) and Duncan's multiple comparison test.

## Supplementary Table S5:

Mineral contents of ten bean cultivars (per 100 g fresh weight).

| Cultivars | Macromineral (mg)          |                             |                               |                            | Micromineral (mg)         |                           |
|-----------|----------------------------|-----------------------------|-------------------------------|----------------------------|---------------------------|---------------------------|
|           | Calcium                    | Sodium                      | Potassium                     | Magnesium                  | Iron                      | Zinc                      |
| 38        | 78.09 ± 1.23 <sup>f</sup>  | 30.15 ± 7.80 <sup>c</sup>   | 894.99 ± 38.09 <sup>ef</sup>  | 104.36 ± 0.14 <sup>i</sup> | 3.89 ± 0.39 <sup>ef</sup> | 1.74 ± 0.03 <sup>g</sup>  |
| 47        | 86.28 ± 0.39 <sup>e</sup>  | 25.79 ± 0.46 <sup>cd</sup>  | 1215.55 ± 32.15 <sup>c</sup>  | 126.20 ± 1.82 <sup>e</sup> | 4.33 ± 0.58 <sup>e</sup>  | 1.87 ± 0.05 <sup>f</sup>  |
| 59        | 90.06 ± 0.78 <sup>de</sup> | 17.56 ± 1.86 <sup>de</sup>  | 1232.86 ± 19.82 <sup>c</sup>  | 115.55 ± 1.83 <sup>f</sup> | 3.70 ± 0.13 <sup>f</sup>  | 1.82 ± 0.01 <sup>fg</sup> |
| 112       | 97.47 ± 1.81 <sup>c</sup>  | 50.05 ± 9.24 <sup>b</sup>   | 1420.42 ± 18.67 <sup>a</sup>  | 111.35 ± 0.38 <sup>g</sup> | 6.55 ± 0.07 <sup>b</sup>  | 2.23 ± 0.01 <sup>e</sup>  |
| 107       | 28.95 ± 0.33 <sup>h</sup>  | 15.17 ± 1.21 <sup>e</sup>   | 1041.71 ± 7.41 <sup>d</sup>   | 158.33 ± 0.88 <sup>c</sup> | 4.88 ± 0.27 <sup>d</sup>  | 2.63 ± 0.02 <sup>c</sup>  |
| 108       | 66.87 ± 1.07 <sup>g</sup>  | 69.15 ± 7.85 <sup>a</sup>   | 1355.18 ± 26.22 <sup>b</sup>  | 107.32 ± 0.45 <sup>h</sup> | 7.07 ± 0.32 <sup>a</sup>  | 2.18 ± 0.01 <sup>e</sup>  |
| CN4       | 107.83 ± 1.36 <sup>b</sup> | 42.33 ± 4.03 <sup>b</sup>   | 842.45 ± 27.63 <sup>f</sup>   | 156.65 ± 0.26 <sup>c</sup> | 5.56 ± 0.22 <sup>c</sup>  | 2.72 ± 0.01 <sup>c</sup>  |
| CN84-1    | 91.90 ± 2.45 <sup>d</sup>  | 20.44 ± 0.64 <sup>cde</sup> | 922.76 ± 5.12 <sup>e</sup>    | 132.63 ± 0.41 <sup>d</sup> | 3.77 ± 0.12 <sup>f</sup>  | 2.42 ± 0.02 <sup>d</sup>  |
| SJ5       | 228.17 ± 0.94 <sup>a</sup> | 19.50 ± 1.62 <sup>de</sup>  | 1181.13 ± 4.25 <sup>c</sup>   | 164.22 ± 1.03 <sup>b</sup> | 6.53 ± 0.25 <sup>b</sup>  | 4.17 ± 0.07 <sup>a</sup>  |
| CM60      | 226.25 ± 6.67 <sup>a</sup> | 44.51 ± 8.35 <sup>b</sup>   | 1390.06 ± 73.49 <sup>ab</sup> | 210.04 ± 2.56 <sup>a</sup> | 6.20 ± 0.23 <sup>b</sup>  | 4.03 ± 0.16 <sup>b</sup>  |

All data were expressed as mean ± standard deviation (SD) of triplicate experiments ( $n = 3$ ). Different superscript letters indicate significantly different contents of the same mineral in different bean cultivars ( $p < 0.05$ ) using one-way analysis of variance (ANOVA) and Duncan's multiple comparison test.

## Supplementary Table S6:

Proximate compositions of *Glycine max* (L.) Merrill cultivars 'SJ5' and 'CM60' compared with data from the USDA FDC and the Thai FCD databases (per 100 g dry weight).

| Samples           | Soybean<br>'SJ5' | Soybean<br>'CM60' | Soybean<br>(USDA FDC <sup>a</sup> ) | Soybean<br>(Thai FCD <sup>b</sup> ) |
|-------------------|------------------|-------------------|-------------------------------------|-------------------------------------|
| Energy (kcal)     | 485.32           | 489.78            | 488                                 | 477 (382) <sup>c</sup>              |
| Protein (g)       | 40.40            | 36.38             | 39.91                               | 39.79                               |
| Fat (g)           | 21.22            | 22.45             | 21.76                               | 19.92                               |
| Carbohydrate (g)  | 33.17            | 35.24             | 33.02                               | 34.92 (10.83) <sup>d</sup>          |
| Dietary fiber (g) | 16.59            | 17.06             | 10.17                               | 24.09                               |
| Ash (g)           | 5.20             | 5.62              | 5.32                                | 5.80                                |
| Vitamin B1 (mg)   | 0.45             | 0.07              | 0.96                                | 1.27                                |
| Vitamin B2 (mg)   | 0.03             | 0.03              | 0.95                                | 0.32                                |
| Vitamin B3 (mg)   | 1.43             | 1.30              | 1.77                                | 2.85                                |
| Calcium (mg)      | 241.39           | 242.17            | 302.86                              | 279.43                              |
| Sodium (mg)       | 20.63            | 47.61             | 2.19                                | 18.70                               |
| Potassium (mg)    | 1249.61          | 1487.96           | 1968.07                             | 1970.30                             |
| Magnesium (mg)    | 173.74           | 224.81            | 306.14                              | NA                                  |
| Iron (mg)         | 6.91             | 6.63              | 17.17                               | 9.69                                |
| Zinc (mg)         | 4.41             | 4.31              | 5.35                                | 3.21                                |

<sup>a</sup> U.S. Department of Agriculture (USDA), Food Data Central (FDC) Database: soybean (FDC ID 174270), calculated to dry weight basis using moisture content of 8.54%.

<sup>b</sup> Thai Food Composition Database: soybean (Food code C33), calculated to dry weight basis using moisture content of 9.1%.

<sup>c</sup> (Energy) was calculated based on the following equation; energy = (protein × 4) + (fat × 9) + (available carbohydrate × 4) + (dietary fiber × 2).

<sup>d</sup> (Carbohydrate) demonstrated available carbohydrate.

NA = data not available

## Supplementary Table S7:

Proximate compositions of *Phaseolus lunatus* L cultivar '38', '47' and '59' compared with data from the USDA FDC and the PulseDM databases (per 100 g dry weight).

| Samples           | Lima bean<br>'38' | Lima bean<br>'47' | Lima bean<br>'59' | Lima bean<br>(USDA FDC <sup>a</sup> ) | Lima bean<br>(PulseDM <sup>b</sup> ) |
|-------------------|-------------------|-------------------|-------------------|---------------------------------------|--------------------------------------|
| Energy (kcal)     | 392.28            | 391.47            | 389.75            | 385                                   | 390 (348) <sup>c</sup>               |
| Protein (g)       | 22.47             | 16.62             | 19.20             | 23.9                                  | 23.0                                 |
| Fat (g)           | 1.27              | 1.72              | 1.33              | 0.77                                  | 1.7                                  |
| Carbohydrate (g)  | 72.75             | 77.39             | 75.25             | 70.60                                 | 70.6 (49.6) <sup>d</sup>             |
| Dietary fiber (g) | 21.34             | 21.93             | 19.21             | 21.20                                 | 21.0                                 |
| Ash (g)           | 3.51              | 4.28              | 4.22              | 4.80                                  | 4.6                                  |
| Vitamin B1 (mg)   | 0.51              | 0.37              | 0.36              | 0.56                                  | 0.6                                  |
| Vitamin B2 (mg)   | 0.03              | 0.03              | 0.03              | 0.22                                  | 0.2                                  |
| Vitamin B3 (mg)   | 1.31              | 1.42              | 1.34              | 1.71                                  | 1.8                                  |
| Calcium (mg)      | 86.40             | 94.87             | 100.47            | 90.2                                  | 74.0                                 |
| Sodium (mg)       | 33.34             | 28.36             | 19.59             | 20.10                                 | 8.0                                  |
| Potassium (mg)    | 990.13            | 1336.65           | 1375.48           | 1915.4                                | 1670.0                               |
| Magnesium (mg)    | 115.46            | 138.76            | 128.91            | 249.44                                | 194.0                                |
| Iron (mg)         | 4.30              | 4.75              | 4.12              | 8.36                                  | 7.2                                  |
| Zinc (mg)         | 1.93              | 2.05              | 2.03              | 3.15                                  | 3.05                                 |

<sup>a</sup> U.S. Department of Agriculture (USDA), Food Data Central (FDC) Database: lima bean (FDC ID 174252), calculated to dry weight basis using moisture content of 10.2%.

<sup>b</sup> FAO/INFOODS Global database for pulses on a dry matter basis (PulseDM): lima bean (Food ID PHL001\_DM).

<sup>c</sup> (Energy) was calculated based on the following equation; energy = (protein × 4) + (fat × 9) + (available carbohydrate × 4) + (dietary fiber × 2).

<sup>d</sup> (Carbohydrate) demonstrated available carbohydrate.

## Supplementary Table S8:

Proximate compositions of *Phaseolus vulgaris* L.cultivar '112' compared with data from the PulseDM, the USDA FDC, and the Thai FCD databases (per 100 dry weight).

| Samples           | Red kidney bean<br>'112' | Red kidney bean<br>(PulseDM <sup>a</sup> ) | Red kidney bean<br>(USDA FDC <sup>b</sup> ) | Red kidney bean<br>(Thai FCD <sup>c</sup> ) |
|-------------------|--------------------------|--------------------------------------------|---------------------------------------------|---------------------------------------------|
| Energy (kcal)     | 386.39                   | 392 (344) <sup>d</sup>                     | 391                                         | 392 (335) <sup>d</sup>                      |
| Protein (g)       | 23.00                    | 25.6                                       | 25.51                                       | 23.04                                       |
| Fat (g)           | 1.38                     | 1.8                                        | 1.20                                        | 2.12                                        |
| Carbohydrate (g)  | 70.48                    | 68.4 (44.2) <sup>e</sup>                   | 69.50                                       | 70.30 (41.6) <sup>e</sup>                   |
| Dietary fiber (g) | 20.93                    | 24.2                                       | 17.23                                       | 28.73                                       |
| Ash (g)           | 5.13                     | 4.0                                        | 3.82                                        | 4.59                                        |
| Vitamin B1 (mg)   | 0.50                     | 0.52                                       | 0.69                                        | NA                                          |
| Vitamin B2 (mg)   | 0.03                     | 0.2                                        | 0.24                                        | 1.49                                        |
| Vitamin B3 (mg)   | 0.51                     | 2.7                                        | 2.39                                        | 2.99                                        |
| Calcium (mg)      | 104.12                   | 98                                         | 94.10                                       | 107.47                                      |
| Sodium (mg)       | 53.48                    | 10                                         | 13.61                                       | NA                                          |
| Potassium (mg)    | 1517.36                  | 1460                                       | 1541.95                                     | NA                                          |
| Magnesium (mg)    | 118.95                   | 167                                        | 156.46                                      | NA                                          |
| Iron (mg)         | 7.00                     | 9.9                                        | 7.59                                        | 7.76                                        |
| Zinc (mg)         | 2.38                     | 3.63                                       | 3.16                                        | NA                                          |

<sup>a</sup>FAO/INFOODS Global database for pulses on a dry matter basis (PulseDM); red kidney bean (Food ID PHV004\_DM).

<sup>b</sup>U.S. Department of Agriculture (USDA), Food Data Central (FDC) Database: red kidney bean (FDC ID 173744), calculated to dry weight basis using moisture content of 11.8%.

<sup>c</sup>Thai Food Composition Database (Thai FCD); red kidney bean (Food code C18), calculated to dry weight basis using moisture content of 11.6%.

<sup>d</sup>(Energy) was calculated based on the following equation; energy = (protein × 4) + (fat × 9) + (available carbohydrate × 4) + (dietary fiber × 2).

<sup>e</sup>(Carbohydrate) demonstrated available carbohydrate.

NA = data not available

## Supplementary Table S9:

Proximate compositions of *Vigna umbellata* (Thunb.) Ohwi & H. Ohashi cultivar '107' and *Vigna angularis* (Wild.) Ohwi & Ohashi '108' compared with data from the PulseDM and the USDA FDC databases (per 100 g dry weight).

| Samples           | Red rice bean<br>'107' | Red rice bean<br>(Thai FCD <sup>a</sup> ) | Rice bean<br>(PulseDM <sup>b</sup> ) | Azuki bean<br>'108' | Azuki bean<br>(PulseDM <sup>b</sup> ) | Azuki bean<br>(USDA FDC <sup>c</sup> ) |
|-------------------|------------------------|-------------------------------------------|--------------------------------------|---------------------|---------------------------------------|----------------------------------------|
| Energy (kcal)     | 386.76                 | 396 (337) <sup>d</sup>                    | 385 (355) <sup>d</sup>               | 386.07              | 387 (357) <sup>d</sup>                | 388                                    |
| Protein (g)       | 22.59                  | 25.51                                     | 21.2                                 | 26.95               | 23                                    | 22.98                                  |
| Fat (g)           | 1.04                   | 2.45                                      | 0.6                                  | 0.77                | 0.6                                   | 0.61                                   |
| Carbohydrate (g)  | 71.75                  | 67.95 (38.33) <sup>e</sup>                | 73.6 (58.6) <sup>e</sup>             | 67.84               | 72.3 (57.6) <sup>e</sup>              | 72.63                                  |
| Dietary fiber (g) | 19.95                  | 29.62                                     | 15.0                                 | 17.75               | 14.7                                  | 14.67                                  |
| Ash (g)           | 4.62                   | 4.11                                      | 4.5                                  | 4.44                | 4.1                                   | 3.76                                   |
| Vitamin B1 (mg)   | 0.14                   | 1.11                                      | 0.52                                 | 0.04                | 0.53                                  | 0.53                                   |
| Vitamin B2 (mg)   | 0.03                   | 0.31                                      | 0.29                                 | 0.02                | 0.25                                  | 0.25                                   |
| Vitamin B3 (mg)   | 1.55                   | 2.49                                      | 3.7                                  | 0.96                | 2.9                                   | 3.04                                   |
| Calcium (mg)      | 31.97                  | 77.95                                     | 322                                  | 71.53               | 84                                    | 76.21                                  |
| Sodium (mg)       | 16.75                  | 17.82                                     | 41                                   | 73.97               | 6                                     | 5.77                                   |
| Potassium (mg)    | 1150.33                | 1316.26                                   | 1570                                 | 1449.51             | 1390                                  | 1443.42                                |
| Magnesium (mg)    | 174.83                 | NA                                        | 227                                  | 114.79              | 144                                   | 5.75                                   |
| Iron (mg)         | 5.39                   | 7.33                                      | 7                                    | 7.56                | 5.2                                   | 5.75                                   |
| Zinc (mg)         | 2.90                   | 2.67                                      | 3.2                                  | 2.33                | 5.64                                  | 5.82                                   |

<sup>a</sup> Thai Food Composition Database (Thai FCD): red rice bean (Food code C16), calculated to dry weight basis using moisture content of 10.2%.

<sup>b</sup> FAO/INFOODS Global database for pulses on a dry matter basis (PulseDM): rice bean (Food ID VIU002\_DM), azuki bean (Food ID VIA001\_DM).

<sup>c</sup> U.S. Department of Agriculture (USDA), Food Data Central (FDC) Database: azuki bean (FDC ID 173727), calculated to dry weight basis using moisture content of 13.4%.

<sup>d</sup> (Energy) was calculated based on the following equation; energy = (protein × 4) + (fat × 9) + (available carbohydrate × 4) + (dietary fiber × 2).

<sup>e</sup> (Carbohydrate) demonstrated available carbohydrate.

NA = data not available

**Supplementary Table S10:**

Proximate compositions of *Vigna mungo* (L.) Hepper cultivar 'CN4' and *Vigna radiata* (L.) Wilczek cultivar 'CN84-1' compared with data from the PulseDM, the USDA FDC, and the Thai FCD databases (per 100 g dry weight).

| Samples           | Black gram 'CN4' | Mung bean 'CN84-1' | Mungo bean (PulseDM <sup>a</sup> ) | Mungo bean (USDA FDC <sup>b</sup> ) | Mung bean (PulseDM <sup>a</sup> ) | Mung bean (USDA FDC <sup>b</sup> ) | Mung bean (Thai FCD <sup>c</sup> ) |
|-------------------|------------------|--------------------|------------------------------------|-------------------------------------|-----------------------------------|------------------------------------|------------------------------------|
| Energy (kcal)     | 390.96           | 391.37             | 392 (350) <sup>d</sup>             | 394.13                              | 394 (360) <sup>d</sup>            | 391.81                             | 394 (335) <sup>d</sup>             |
| Protein (g)       | 25.42            | 26.3               | 26.4                               | 28.25                               | 23.2                              | 26.28                              | 25.56                              |
| Fat (g)           | 1.10             | 1.4                | 1.5                                | 1.84                                | 1.5                               | 1.26                               | 1.77                               |
| Carbohydrate (g)  | 69.83            | 68.39              | 68.3 (46.7) <sup>e</sup>           | 66.14                               | 71.9 (54.9) <sup>e</sup>          | 68.83                              | 68.89 (39.86) <sup>e</sup>         |
| Dietary fiber (g) | 23.23            | 12.56              | 21.6                               | 20.52                               | 17.0                              | 17.92                              | 29.03                              |
| Ash (g)           | 3.64             | 3.91               | 3.7                                | 3.77                                | 3.4                               | 3.65                               | 3.79                               |
| Vitamin B1 (mg)   | 0.44             | 0.16               | 0.57                               | 0.31                                | 0.41                              | 0.68                               | 0.88                               |
| Vitamin B2 (mg)   | 0.11             | 0.04               | 0.26                               | 0.28                                | 0.29                              | 0.26                               | 0.26                               |
| Vitamin B3 (mg)   | 1.39             | 1.35               | 2.1                                | 1.63                                | 2.4                               | 2.47                               | 2.74                               |
| Calcium (mg)      | 117.15           | 96.85              | 120                                | 154.71                              | 99                                | 145.13                             | 96.77                              |
| Sodium (mg)       | 45.98            | 21.54              | 23                                 | 42.60                               | 10                                | 16.49                              | 75.64                              |
| Potassium (mg)    | 915.34           | 972.51             | 1280                               | 1102.02                             | 1300                              | 1374.38                            | 1231.37                            |
| Magnesium (mg)    | 170.20           | 139.78             | 224                                | 299.33                              | 154                               | 207.81                             | 120.13                             |
| Iron (mg)         | 6.04             | 3.97               | 8.2                                | 8.49                                | 4.9                               | 7.41                               | 7.79                               |
| Zinc (mg)         | 2.95             | 2.55               | 3.37                               | 3.76                                | 1.8                               | 2.95                               | 3.24                               |

<sup>a</sup>FAO/INFOODS Global database for pulses on a dry matter basis (PulseDM): mungo bean (Food ID VIM001\_DM) and mung bean (Food ID VIR001\_DM).

<sup>b</sup>U.S. Department of Agriculture (USDA), Food Data Central (FDC) Database: mungo bean (FDC ID 174259), calculated to dry weight basis using moisture content of 10.2%, and mung bean (FDC ID 174256), calculated to dry weight basis using moisture content of 9.05%.

<sup>c</sup>Thai Food Composition Database (Thai FCD): mung bean (Food code C15), calculated to dry weight basis using moisture content of 10.1%.

<sup>d</sup>(Energy) was calculated based on the following equation; energy = (protein × 4) + (fat × 9) + (available carbohydrate × 4) + (dietary fiber × 2).

<sup>e</sup>(Carbohydrate) demonstrated available carbohydrate.
